# Supplementary material for: Microaxial Flow Pump Use and Renal Outcomes in Infarct-Related Cardiogenic Shock: A Secondary Analysis of the DanGer Shock Trial
Source: PubMed Central journal article supplement — Circulation. 2024 Oct 27;150(25):1990–2003. doi: 10.1161/CIRCULATIONAHA.124.072370 (PMC11643129; doi:10.1161/circulationaha.124.072370), 2024-10-27
Supplement: cir-150-1990-s001.pdf [file cir-150-1990-s001.pdf]

Microaxial Flow Pump Use and Renal Outcomes in Infarct-  
Related Cardiogenic Shock – a Secondary Analysis of the  
DanGer Shock Trial

SUPPLEMENTAL MATERIAL

## The DanGer Shock Study Protocol: Renal Section

Guidance on initiation for renal replacement therapy and treatment target in the DanGer

Shock protocol (the full DanGer Shock study protocol is available at:

[https://www.nejm.org/doi/suppl/10.1056/NEJMoa2312572/suppl\\_file/nejmoa2312572\\_protocol.pdf](https://www.nejm.org/doi/suppl/10.1056/NEJMoa2312572/suppl_file/nejmoa2312572_protocol.pdf)

- Normal renal function: furosemide infusion: 5-40 mg/h iv if diuresis <1 ml/kg/h.
- Fluid balance is adjusted to secure adequate CVP (10-12 mmHg) but avoid volume overload (negative fluid balance)
- Renal impairment before or during hospitalization results in CRRT by the following indications:
  - Renal insufficiency (s-creatinine > 300-400 mmol/l)
  - Hyperkalemia (s-potassium > 6,5 mmol/l)
  - Treatment-resistant metabolic acidosis (pH <7.30)
  - Volume overload (pulmonary edema) or TD <50 ml for 6 consecutive hours
- Loop diuretics may be supplemented with metolazone 2.5-10 mg/day orally.
- Dialysis catheters are recommended placed in Jugular / subclavia veins.
- CRRT is implemented according to the individual center's own guidelines.

**Supplemental Table 1: Baseline characteristics of patients undergoing RRT in both study arms.**

| Characteristic                                              | All            |                |         | Standard       |                |         | mAFP              |                   |         |
|-------------------------------------------------------------|----------------|----------------|---------|----------------|----------------|---------|-------------------|-------------------|---------|
|                                                             | No RRT, N      | RRT, N         | p-value | No RRT, N      | RRT, N         | p-value | No RRT, N         | RRT, N            | p-value |
|                                                             | = 233          | 122            | value   | = 129          | 47             | value   | = 104             | 75                | value   |
| Age in years, median (IQR)                                  | 70 (61, 77)    | 67 (57, 74)    | 0.007   | 70 (62, 76)    | 67 (57, 72)    | 0.063   | 70 (59, 77)       | 66 (57, 74)       | 0.082   |
| Male sex, no. (%)                                           | 175 (75%)      | 106 (87%)      | 0.009   | 100 (78%)      | 39 (83%)       | 0.43    | 75 (72%)          | 67 (89%)          | 0.005   |
| Hypertension, no. (%)                                       | 129 (55%)      | 54 (44%)       | 0.047   | 72 (56%)       | 22 (47%)       | 0.29    | 57 (55%)          | 32 (43%)          | 0.11    |
| Diabetes, no. (%)                                           | 48 (21%)       | 32 (26%)       | 0.23    | 32 (25%)       | 15 (32%)       | 0.35    | 16 (15%)          | 17 (23%)          | 0.22    |
| History of Myocardial infarction, no. (%)                   | 43 (18%)       | 14 (11%)       | 0.089   | 22 (17%)       | 6 (13%)        | 0.49    | 21 (20%)          | 8 (11%)           | 0.088   |
| History of Heart failure, no. (%)                           | 16 (6.9%)      | 12 (9.8%)      | 0.23    | 10 (7.8%)      | 4 (8.5%)       | >0.99   | 6 (5.8%)          | 8 (11%)           | 0.10    |
| History of Chronic kidney disease, no. (%)                  | 23 (9.9%)      | 12 (9.8%)      | >0.99   | 14 (11%)       | 4 (8.5%)       | 0.78    | 9 (8.7%)          | 8 (11%)           | 0.65    |
| Endotracheal intubation before arrival at cath lab, no. (%) | 39 (17%)       | 24 (20%)       | 0.49    | 21 (16%)       | 7 (15%)        | 0.82    | 18 (17%)          | 17 (23%)          | 0.37    |
| Systolic blood pressure at randomization, median (IQR)      | 81 (70, 91)    | 84 (74, 92)    | 0.39    | 81 (73, 90)    | 83 (71, 95)    | 0.72    | 80 (70, 91)       | 85 (75, 90)       | 0.46    |
| Resuscitation before randomization, no. (%)                 | 50 (21%)       | 22 (18%)       | 0.45    | 27 (21%)       | 6 (13%)        | 0.22    | 23 (22%)          | 16 (21%)          | 0.90    |
| Mean arterial blood pressure at randomization, median (IQR) | 63 (55, 71)    | 64 (56, 72)    | 0.46    | 64 (55, 71)    | 64 (55, 73)    | 0.88    | 62 (54, 71)       | 64 (57, 72)       | 0.38    |
| Heart rate at randomization, median (IQR)                   | 95 (75, 107)   | 95 (79, 120)   | 0.040   | 95 (74, 110)   | 96 (80, 121)   | 0.16    | 91 (77, 104)      | 95 (78, 118)      | 0.10    |
| LVEF at randomization (%), median (IQR)                     | 25 (20, 35)    | 20 (15, 29)    | <0.001  | 25 (15, 30)    | 20 (13, 25)    | 0.002   | 29 (20, 35)       | 20 (15, 30)       | 0.004   |
| Lactate concentration at randomization, median (IQR)        | 4.3 (3.2, 6.6) | 5.2 (3.5, 8.0) | 0.019   | 4.3 (3.1, 6.0) | 5.3 (3.5, 8.9) | 0.034   | 4.30 (3.30, 7.10) | 4.90 (3.60, 7.00) | 0.24    |

| Characteristic                                                                           | All                     |                         |       | Standard                |                         |       | mAFP                    |                         |       |
|------------------------------------------------------------------------------------------|-------------------------|-------------------------|-------|-------------------------|-------------------------|-------|-------------------------|-------------------------|-------|
|                                                                                          | No RRT, N               | RRT, N =                | p-    | No RRT, N               | RRT, N =                | p-    | No RRT, N               | RRT, N =                | p-    |
|                                                                                          | = 233                   | 122                     | value | = 129                   | 47                      | value | = 104                   | 75                      | value |
| pH at randomization, median (IQR)                                                        | 7.30<br>(7.18,<br>7.39) | 7.26<br>(7.16,<br>7.33) | 0.012 | 7.30<br>(7.20,<br>7.39) | 7.26<br>(7.17,<br>7.32) | 0.057 | 7.29<br>(7.17,<br>7.39) | 7.26<br>(7.15,<br>7.35) | 0.12  |
| Hemoglobin admission, median (IQR)                                                       | 8.70<br>(7.52,<br>9.50) | 9.10<br>(7.85,<br>9.70) | 0.043 | 8.70<br>(7.60,<br>9.40) | 9.10<br>(8.10,<br>9.80) | 0.089 | 8.60<br>(7.50,<br>9.58) | 9.05<br>(7.70,<br>9.60) | 0.29  |
| Creatinine at admission, $\mu\text{mol/L}$ , median (IQR)                                | 104 (84,<br>130)        | 114 (94,<br>156)        | 0.001 | 105 (85,<br>139)        | 116 (95,<br>155)        | 0.11  | 100 (81,<br>123)        | 113 (94,<br>160)        | 0.001 |
| eGFR, mL/min/1.73 m <sup>2</sup> , median (IQR)                                          | 64 (48,<br>82)          | 60 (40,<br>76)          | 0.034 | 61 (43,<br>79)          | 55 (41,<br>71)          | 0.26  | 65 (52,<br>87)          | 62 (40,<br>77)          | 0.031 |
| C-reactive protein (CRP) at admission, mg/L, median (IQR)                                | 5 (2, 22)               | 5 (3, 22)               | 0.35  | 5 (2, 25)               | 5 (4, 21)               | 0.52  | 5 (2, 19)               | 5 (2, 19)               | 0.33  |
| SCAI stage at admission, n (%)                                                           |                         |                         | 0.009 |                         |                         | 0.007 |                         |                         | 0.23  |
| SCAI C                                                                                   | 141 (61%)               | 56 (46%)                |       | 79 (61%)                | 18 (38%)                |       | 62 (60%)                | 38 (51%)                |       |
| SCAI D or E                                                                              | 92 (39%)                | 66 (54%)                |       | 50 (39%)                | 29 (62%)                |       | 42 (40%)                | 37 (49%)                |       |
| Anterior myocardial infarction, no. (%)                                                  | 164 (70%)               | 91 (75%)                | 0.40  | 95 (74%)                | 34 (72%)                | 0.86  | 69 (66%)                | 57 (76%)                | 0.16  |
| Multivessel, no. (%)                                                                     | 167 (72%)               | 89 (73%)                | 0.80  | 91 (71%)                | 38 (81%)                | 0.17  | 76 (73%)                | 51 (68%)                | 0.46  |
| Time of randomization, n (%)                                                             |                         |                         | 0.75  |                         |                         | >0.99 |                         |                         | 0.57  |
| Randomization performed before revascularization                                         | 130 (56%)               | 71 (58%)                |       | 75 (58%)                | 27 (57%)                |       | 55 (53%)                | 44 (59%)                |       |
| Randomization performed in the catheterization laboratory but after revascularization    | 66 (28%)                | 30 (25%)                |       | 35 (27%)                | 13 (28%)                |       | 31 (30%)                | 17 (23%)                |       |
| Randomization performed $\leq 12$ hr after departure from the catheterization laboratory | 37 (16%)                | 21 (17%)                |       | 19 (15%)                | 7 (15%)                 |       | 18 (17%)                | 14 (19%)                |       |

eGFR denotes estimated glomerular filtration rate; mAFP denotes microaxial flow pump; LVEF denotes left ventricular ejection fraction; RRT denotes renal replacement therapy.

**Supplemental Table 2: Trajectories of VIS, pH, base excess and MAP**

| Parameter   | Group      | Rand                | ICU                  | 1h                   | 3h                  | 6h                  | 12h                 | 24h                | 48h                |
|-------------|------------|---------------------|----------------------|----------------------|---------------------|---------------------|---------------------|--------------------|--------------------|
| VIS         | Standard   |                     | 8.0 (5.5 - 10.6)     | 10.9 (7.8 - 14.0)    | 15.9 (12.2 - 19.6)  | 19.3 (15.2 - 23.4)  | 16.1 (12.3 - 19.8)  | 13.6 (10.0 - 17.2) | 9.9 (7.0 - 12.8)   |
|             | mAFP       |                     | 5.7 (3.6 - 7.8)      | 8.1 (5.6 - 10.7)     | 10.9 (8.0 - 13.8)   | 12.6 (9.5 - 15.7)   | 12.2 (9.1 - 15.3)   | 14.7 (11.3 - 18.2) | 14.1 (10.9 - 17.3) |
|             | Difference |                     | 2.3 (-1.0 - 5.7)     | 2.8 (-1.2 - 6.7)     | 5.0 (0.3 - 9.7)     | 6.6 (1.5 - 11.8)    | 3.9 (-1.0 - 8.7)    | -1.1 (-6.1 - 3.8)  | -4.2 (-8.4 - 0.1)  |
| pH          | Standard   | 7.27 (7.25 - 7.29)  | 7.26 (7.24 - 7.28)   | 7.29 (7.27 - 7.31)   | 7.33 (7.31 - 7.35)  | 7.35 (7.33 - 7.37)  | 7.38 (7.37 - 7.40)  | 7.42 (7.40 - 7.43) | 7.43 (7.42 - 7.44) |
|             | mAFP       | 7.26 (7.24 - 7.29)  | 7.29 (7.27 - 7.32)   | 7.31 (7.30 - 7.33)   | 7.33 (7.32 - 7.35)  | 7.34 (7.32 - 7.37)  | 7.37 (7.35 - 7.38)  | 7.39 (7.38 - 7.40) | 7.41 (7.40 - 7.42) |
|             | Difference | 0.00 (-0.03 - 0.04) | -0.03 (-0.06 - 0.00) | -0.02 (-0.05 - 0.00) | 0.00 (-0.03 - 0.02) | 0.01 (-0.02 - 0.04) | 0.01 (-0.01 - 0.03) | 0.02 (0.01 - 0.04) | 0.02 (0.00 - 0.03) |
| Base excess | Standard   |                     | -6.4 (-7.5 - -5.4)   |                      |                     |                     | -2.1 (-2.9 - -1.4)  | 0.1 (-0.6 - 0.9)   | 1.0 (0.1 - 1.9)    |
|             | mAFP       |                     | -5.7 (-6.7 - -4.6)   |                      |                     |                     | -2.8 (-3.5 - -2.1)  | -1.6 (-2.3 - -0.9) | -0.2 (-1.0 - 0.6)  |
| Difference  |            |                     | -0.8 (-2.2 - 0.7)    |                      |                     |                     | 0.7 (-0.4 - 1.7)    | 1.7 (0.7 - 2.8)    | 1.2 (0.0 - 2.4)    |
|             |            |                     |                      |                      |                     |                     |                     |                    |                    |
| MAP         | Standard   | 64.7 (62.7 - 66.7)  | 76.1 (73.0 - 79.1)   | 71.9 (69.0 - 74.9)   | 74.5 (71.8 - 77.2)  | 70.7 (68.2 - 73.2)  | 70.0 (67.9 - 72.1)  | 71.1 (69.0 - 73.3) | 72.4 (70.2 - 74.6) |
|             | mAFP       | 64.1 (62.1 - 66.1)  | 79.8 (76.9 - 82.8)   | 79.0 (76.2 - 81.7)   | 75.1 (72.6 - 77.6)  | 74.0 (71.7 - 76.2)  | 73.2 (71.3 - 75.1)  | 70.0 (68.1 - 72.0) | 69.9 (68.0 - 71.9) |
|             | Difference | 0.6 (-2.3 - 3.4)    | -3.8 (-8.0 - 0.5)    | -7.0 (-11.0 - -3.0)  | -0.6 (-4.3 - 3.1)   | -3.3 (-6.6 - 0.1)   | -3.2 (-6.0 - -0.4)  | 1.1 (-1.8 - 4.0)   | 2.5 (-0.5 - 5.4)   |

Estimated geometric means of the parameters on the left (with 95% confidence intervals) for each time point, calculated from linear mixed models.

**Supplemental Table 3:** Stimulation of diuresis and prior use of ACE inhibitor or angiotensin I receptor blocker in both study arms

|                                                                       | Standard care | Impella    | P value |
|-----------------------------------------------------------------------|---------------|------------|---------|
| <b>Stimulation of diuresis within first 24 hours of ICU admission</b> |               |            |         |
| <b>Furosemide bolus</b>                                               | 48 (36.9%)    | 59 (38.6%) | P=0.78  |
| <b>Furosemide infusion</b>                                            | 38 (29.2%)    | 43 (28.1%) | P=0.84  |
| <b>Metolazone</b>                                                     | 7 (5.4%)      | 7 (4.6%)   | P=0.75  |
| <b>Stimulation of diuresis 24 – 48 hours after ICU admission</b>      |               |            |         |
| <b>Furosemide bolus</b>                                               | 35 (28.9%)    | 39 (27.1%) | P=0.74  |
| <b>Furosemide infusion</b>                                            | 28 (23.1%)    | 27 (18.8%) | P=0.38  |
| <b>Metolazone</b>                                                     | 5 (4.1%)      | 5 (3.5%)   | P=0.78  |
| <b>Treatment before admission</b>                                     |               |            |         |
| <b>ACE inhibitor or<br/>angiotensin II receptor<br/>blocker</b>       | 49 (28.3%)    | 57 (32.0%) | P=0.45  |

**Supplemental Table 4:** Stimulation of diuresis and prior use of ACE inhibitor or angiotensin I receptor blocker in patients with and without AKI/RRT

|                                                                       | No AKI     | AKI no RRT | AKI and RRT | P value       |
|-----------------------------------------------------------------------|------------|------------|-------------|---------------|
| <b>Stimulation of diuresis within first 24 hours of ICU admission</b> |            |            |             |               |
| <b>Furosemide bolus</b>                                               | 40 (33.6%) | 28 (53.8%) | 39 (34.8%)  | <b>P=0.03</b> |
| <b>Furosemide infusion</b>                                            | 28 (23.5%) | 15 (28.8%) | 38 (33.9%)  | P=0.21        |
| <b>Metolazone</b>                                                     | 3 (2.5%)   | 3 (5.8%)   | 8 (7.1%)    | P=0.26        |
| <b>Stimulation of diuresis 24 – 48 hours after ICU admission</b>      |            |            |             |               |
| <b>Furosemide bolus</b>                                               | 37 (32.7%) | 17 (38.6%) | 20 (18.5%)  | <b>P=0.01</b> |
| <b>Furosemide infusion</b>                                            | 22 (19.5%) | 12 (27.3%) | 21 (19.4%)  | P=0.51        |
| <b>Metolazone</b>                                                     | 3 (2.7%)   | 3 (6.8%)   | 4 (3.7%)    | P=0.45        |
| <b>Treatment before admission</b>                                     |            |            |             |               |
| <b>ACE inhibitor or angiotensin II receptor blocker</b>               | 50 (30.3%) | 22 (33.3%) | 34 (28.3%)  | P=0.78        |



**Supplemental Table 5:** Univariable predictors of RRT in both study arms.

| Covariate                                                  | <u>Standard (RRT:</u> |         | <u>mAFP (RRT:</u>  |         |
|------------------------------------------------------------|-----------------------|---------|--------------------|---------|
|                                                            | <u>n=47/176)</u>      |         | <u>n=75/179)</u>   |         |
|                                                            | SHR (95% CI)          | P       | SHR (95% CI)       | P       |
| Age                                                        | 0.98 (0.96 - 1.00)    | 0.06    | 0.99 (0.97 - 1.00) | 0.10    |
| Gender                                                     | 1.29 (0.61 - 2.73)    | 0.50    | 2.40 (1.18 - 4.89) | 0.02    |
| Lactate at admission, by 10% increase                      | 1.06 (1.01 - 1.11)    | 0.02    | 1.03 (0.99 - 1.08) | 0.16    |
| LVEF at randomization (%)                                  | 0.96 (0.94 - 0.99)    | < 0.01  | 0.97 (0.95 - 0.99) | < 0.01  |
| Heart rate at randomization                                | 1.01 (1.00 - 1.02)    | 0.04    | 1.01 (1.00 - 1.01) | 0.09    |
| Creatinine at admission, by 10% increase                   | 1.06 (1.01 - 1.12)    | 0.02    | 1.06 (1.02 - 1.09) | < 0.001 |
| eGFR at admission                                          | 0.99 (0.98 - 1.00)    | 0.21    | 0.99 (0.98 - 1.00) | 0.02    |
| Bleeding                                                   |                       |         |                    |         |
| No Bleeding                                                | Ref                   |         | Ref                |         |
| BARC 3-5                                                   | 4.23 (2.54 - 7.03)    | < 0.001 | 1.75 (1.17 - 2.62) | < 0.01  |
| Bilirubin at 24 hours, by 10% increase                     | 1.13 (1.06 - 1.19)    | < 0.001 | 1.06 (1.03 - 1.09) | < 0.001 |
| SCAI classification                                        |                       |         |                    |         |
| SCAI C                                                     | Ref                   |         | Ref                |         |
| SCAI D or E                                                | 2.19 (1.25 - 3.84)    | < 0.01  | 1.32 (0.87 - 1.99) | 0.19    |
| Highest plasma free hemoglobin at day 1-3 by 10 % increase | 1.00 (0.96 - 1.05)    | 0.89    | 1.00 (1.01 - 1.04) | < 0.01  |
| Fluid balance at 24 hours                                  |                       |         |                    |         |
| Neutral fluid balance ( $\pm 0.5$ L) Ref)                  | Ref                   |         | Ref                |         |

**Supplemental Table 5:** Univariable predictors of RRT in both study arms.

| Covariate                        | <u>Standard (RRT:</u> |            | <u>mAFP (RRT:</u>  |            |
|----------------------------------|-----------------------|------------|--------------------|------------|
|                                  | <u>n=47/176)</u>      |            | <u>n=75/179)</u>   |            |
|                                  | SHR (95% CI)          | P          | SHR (95% CI)       | P          |
| Negative fluid balance           | 0.89 (0.30 - 2.64)    | 0.83       | 0.96 (0.38 - 2.45) | 0.93       |
| Positive fluid balance < 2.5 L   | 1.54 (0.66 - 3.57)    | 0.32       | 1.27 (0.69 - 2.32) | 0.44       |
| Positive fluid balance > 2.5 L   | 2.01 (0.83 - 4.83)    | 0.12       | 1.39 (0.78 - 2.48) | 0.27       |
| Escalation to veno-arterial ECMO | 3.30 (1.94 - 5.62)    | <<br>0.001 | 2.06 (1.34 - 3.16) | < 0.01     |
| Suction                          |                       |            | 2.67 (1.77 - 4.03) | <<br>0.001 |
| P level at 6 hours               |                       |            |                    |            |
| Low - Medium (1-6)               |                       |            | Ref                |            |
| High (7-9)                       |                       |            | 1.86 (1.17 - 2.95) | < 0.01     |

RRT: Renal replacement therapy, SHR: Subdistribution hazard ratio. Values for creatinine, plasma free hemoglobin, lactate, and bilirubin were log-transformed prior to regression analysis.

## Supplemental Figure 1: Risk of RRT in mAFP versus standard of care groups, stratified by prespecified subgroups

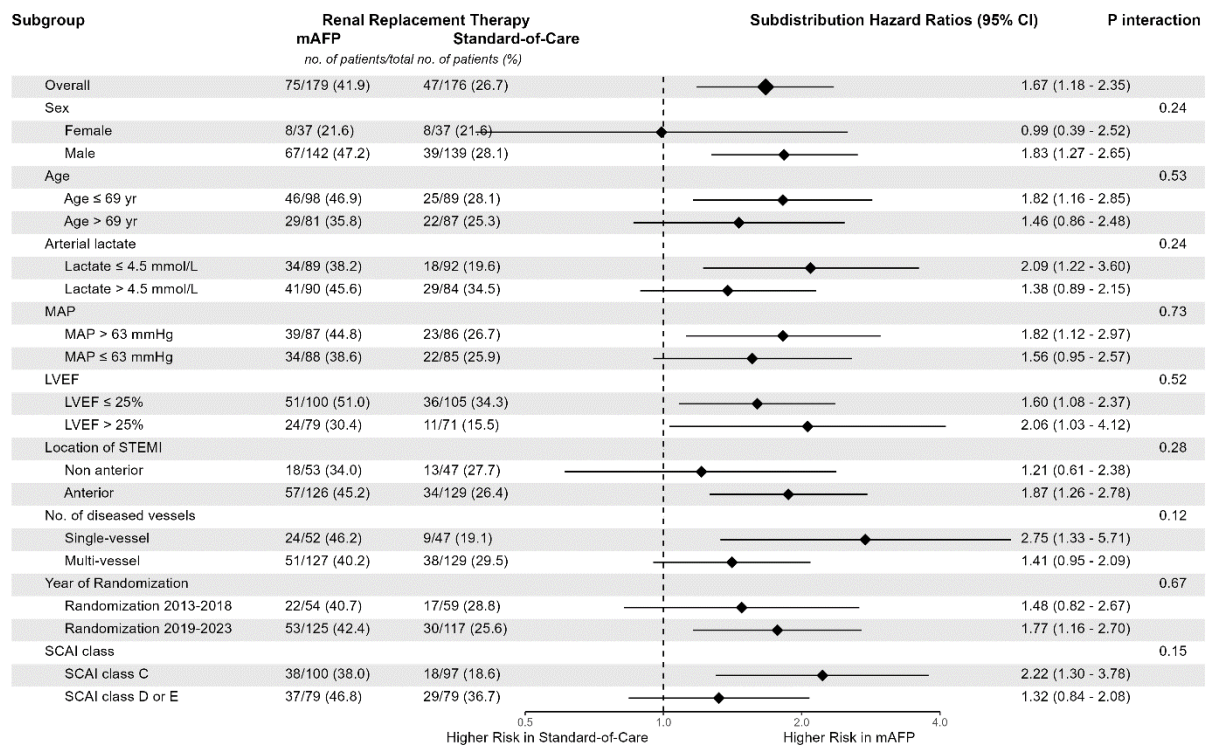

## Appendix

### DanGer Shock Investigators

Department of cardiology and Department of Anesthesiology **Odense University Hospital**, Odense, and Department of Clinical Research, University of Southern, Odense, Denmark.

Professor Jacob Eifer Møller (principal investigator [PI] and sponsor), Professor Lisette Okkels Jensen, Dr Anders Junker, Dr Karsten Tange Veien, Dr Nanna Louise Junker Udesen, professor Hanne Berg Ravn, professor Jens Flensted Lassen, dr Kristian Wachtell and Associate Professor Henrik Schmidt.

Department of Cardiology, Heart Center, **Copenhagen University Hospital Rigshospitalet**, Copenhagen, and Department of Clinical Medicine, University of Copenhagen, Copenhagen, Denmark

Professor Christian Hassager, Professor Thomas Engstrøm, Associate Professor Lene Holmvang, Associate Professor Jesper Kjaergaard, Associate Professor Rikke Sørensen, Associate Professor Jacob Lønborg, Dr Martin Fryldand, Dr Rasmus Paulin Beske, Dr Søren Boesgaard.

Department of Cardiology and Anesthesiology, **Aarhus University Hospital**, Aarhus, Denmark.

Professor Hans Eiskjær, Professor Steffen Christensen, Associate Professor Evald Høj Christiansen, Professor Steffen Christensen and Professor Christian Juhl Terkelsen.

Department of Cardiology and Angiology, **Hannover Medical School**, Hannover, Germany.

Professor Andreas Schäfer (National German PI).

Department of Internal Medicine and Cardiology, **Heart Center Dresden University Hospital**,  
Dresden, Germany and Technische Universität Dresden, Dresden, Germany.

Professor Axel Linke, Dr Felix J Woitek, Jennifer Hommel PhD, and Professor Norman Mangner.

Department of Cardiology, Pulmonology and Vascular Medicine, **University Hospital  
Düsseldorf**, Medical Faculty of the Heinrich Heine University Düsseldorf, Düsseldorf, Germany.

Professor Amin Polzin and Professor Ralf Westenfeld.

Department of Cardiology, **University Hospital Jena**, Jena, Germany.

Professor Christian Schulze and Professor Sven Moebius-Winkler.

Department of Cardiology, Angiology and Intensive Care Medicine, **Deutsches Herzzentrum  
der Charité**, Campus Benjamin Franklin, Berlin, Germany; Deutsches Zentrum für Herz-  
Kreislauf-Forschung e.V., Berlin, Germany.

Professor Carsten Skurk.

Department of Internal Medicine I, **University Hospital Würzburg**, Würzburg, Germany.

Professor Peter Nordbeck.

Department of Cardiology, University Heart and Vascular Center (UHZ), **University Clinic  
Hamburg – Eppendorf (UKE)**, Hamburg, Germany.

Professor Peter Clemmensen and Professor Dirk Westermann.

Department of Cardiology, **Royal Brompton and Harefield Hospitals**, Guy's and St. Thomas'  
NHS Foundation Trust, Harefield Hospital, Harefield, United Kingdom.

Professor Vasileios Panoulas.

Department of Cardiology, **University Hospital Bonn**, Bonn, Germany.

Professor Sebastian Zimmer.

**Heartcenter Trier**, Krankenhaus der Barmherzigen Brüder, Trier, Germany.

Professor Nikos Werner.

Department of Anesthesiology and Intensive Care, **Aalborg University Hospital**, Aalborg,

Denmark

Dr Inge De Haas.
